# Supplementary material for: The effects of aging on molecular modulators of human embryo implantation
Source: PubMed Central journal article supplement (PMC8271113; doi:10.1016/j.isci.2021.102751), 2021-06-19
Supplement: mmc9.pdf [file mmc9.pdf]

**Table S8. Subset of transcripts derived from DaMiRseq R package, that could be used to separate trophoctoderm samples by maternal age. Related to Figure 4 and STAR methods. RefSeq ID and associated gene names are displayed per subset of 290 (FSelect function) and 58 (FReduct function) transcripts.**

| refSeq (290 transcripts) | gene name | refSeq (290 transcripts) | gene name | refSeq (290 transcripts) | gene name | refSeq (58 transcripts) | gene name |
|--------------------------|-----------|--------------------------|-----------|--------------------------|-----------|-------------------------|-----------|
| NM_000041                | APOE      | NM_001302623             | DHX8      | NM_004508                | IDI1      | NM_000104               | CYP1B1    |
| NM_000104                | CYP1B1    | NM_001302688             | APOE      | NM_004525                | LRP2      | NM_000915               | OXT       |
| NM_000274                | OAT       | NM_001302689             | APOE      | NM_004748                | CCPG1     | NM_001005374            | LRSAM1    |
| NM_000413                | HSD17B1   | NM_001302690             | APOE      | NM_004827                | ABCG2     | NM_001039361            | PRAMEF10  |
| NM_000499                | CYP1A1    | NM_001302691             | APOE      | NM_005035                | POLRMT    | NM_001040663            | GAGE1     |
| NM_000560                | CD53      | NM_001303253             | ACAT2     | NM_005100                | AKAP12    | NM_001130964            | PLCD1     |
| NM_000781                | CYP11A1   | NM_001316964             | REEP4     | NM_005542                | INSIG1    | NM_001145140            | CXorf49   |
| NM_000786                | CYP51A1   | NM_001316965             | REEP4     | NM_005656                | TMPRSS2   | NM_001146109            | PTGR1     |
| NM_000915                | OXT       | NM_001317955             | IDI1      | NM_005891                | ACAT2     | NM_001174160            | SH2D4A    |
| NM_001002264             | EPSTI1    | NM_001317956             | IDI1      | NM_005983                | SKP2      | NM_001193544            | ANXA6     |
| NM_001005374             | LRSAM1    | NM_001317957             | IDI1      | NM_006184                | NUCB1     | NM_001197               | BIK       |
| NM_001017369             | MSMO1     | NM_001319075             | B3GNT2    | NM_006225                | PLCD1     | NM_001286679            | LARP6     |
| NM_001032396             | PJA1      | NM_001319216             | CYP1A1    | NM_006404                | PROCR     | NM_001316965            | REEP4     |
| NM_001039361             | PRAMEF10  | NM_001319217             | CYP1A1    | NM_006424                | SLC34A2   | NM_001319217            | CYP1A1    |
| NM_001040033             | CD53      | NM_001320329             | NDRG2     | NM_006435                | IFITM2    | NM_001322220            | DHX8      |
| NM_001040663             | GAGE1     | NM_001320638             | CD53      | NM_006500                | MCAM      | NM_001322967            | OAT       |
| NM_001042632             | SNX21     | NM_001320996             | FABP3     | NM_006558                | KHDRBS3   | NM_001324224            | HMGCS1    |
| NM_001042633             | SNX21     | NM_001321463             | NCLN      | NM_006577                | B3GNT2    | NM_001348989            | ABCG2     |
| NM_001076552             | ACSS2     | NM_001322218             | DHX8      | NM_006745                | MSMO1     | NM_001360               | DHCR7     |
| NM_001077494             | NFKB2     | NM_001322219             | DHX8      | NM_006868                | RAB31     | NM_001424               | EMP2      |
| NM_001079815             | TMEM52B   | NM_001322220             | DHX8      | NM_006927                | ST3GAL2   | NM_001457               | FLNB      |
| NM_001079862             | DBI       | NM_001322934             | NFKB2     | NM_012212                | PTGR1     | NM_001512               | GSTA4     |
| NM_001079863             | DBI       | NM_001322935             | NFKB2     | NM_012307                | EPB41L3   | NM_001975               | ENO2      |
| NM_001098272             | HMGCS1    | NM_001322965             | OAT       | NM_014365                | HSPB8     | NM_002490               | NDUFA6    |
| NM_001099773             | CYP11A1   | NM_001322966             | OAT       | NM_014573                | TMEM97    | NM_002502               | NFKB2     |
| NM_001111045             | CCNA1     | NM_001322967             | OAT       | NM_015687                | FILIP1    | NM_003129               | SQLE      |
| NM_001111046             | CCNA1     | NM_001322968             | OAT       | NM_015908                | SRRT      | NM_003818               | CDS2      |
| NM_001111047             | CCNA1     | NM_001322969             | OAT       | NM_015925                | LSR       | NM_003979               | GPRC5A    |
| NM_001127255             | NLRP7     | NM_001322970             | OAT       | NM_016084                | RASD1     | NM_004165               | RRAD      |
| NM_001128850             | RRAD      | NM_001322971             | OAT       | NM_016250                | NDRG2     | NM_004477               | FRG1      |
| NM_001128852             | SRRT      | NM_001322974             | OAT       | NM_016619                | PLAC8     | NM_004525               | LRP2      |
| NM_001128853             | SRRT      | NM_001323067             | PFKP      | NM_017826                | SOHLH2    | NM_005035               | POLRMT    |

|              |                |              |         |           |          |           |          |
|--------------|----------------|--------------|---------|-----------|----------|-----------|----------|
| NM_001128854 | SRRT           | NM_001323068 | PFKP    | NM_018030 | OSBPL1A  | NM_005656 | TMPRSS2  |
| NM_001130715 | PLAC8          | NM_001323069 | PFKP    | NM_018641 | CHST12   | NM_006404 | PROCR    |
| NM_001130716 | PLAC8          | NM_001323070 | PFKP    | NM_018677 | ACSS2    | NM_006424 | SLC34A2  |
| NM_001130964 | PLCD1          | NM_001323071 | PFKP    | NM_019058 | DDIT4    | NM_006435 | IFITM2   |
| NM_001135099 | TMPRSS2        | NM_001323072 | PFKP    | NM_019079 | L1TD1    | NM_006500 | MCAM     |
| NM_001142776 | CHAC1          | NM_001323073 | PFKP    | NM_020166 | MCCC1    | NM_006577 | B3GNT2   |
| NM_001145139 | CXorf49B       | NM_001323074 | PFKP    | NM_020170 | NCLN     | NM_006868 | RAB31    |
| NM_001145140 | CXorf49        | NM_001324219 | HMGCS1  | NM_020548 | DBI      | NM_006927 | ST3GAL2  |
| NM_001145160 | TPM4           | NM_001324220 | HMGCS1  | NM_020739 | CCPG1    | NM_014365 | HSPB8    |
| NM_001146108 | PTGR1          | NM_001324222 | HMGCS1  | NM_020975 | RET      | NM_015687 | FILIP1   |
| NM_001146109 | PTGR1          | NM_001324223 | HMGCS1  | NM_021034 | IFITM3   | NM_018677 | ACSS2    |
| NM_001155    | ANXA6          | NM_001324224 | HMGCS1  | NM_021076 | NEFH     | NM_019058 | DDIT4    |
| NM_001161342 | TMEM171        | NM_001330219 | HSD17B1 | NM_021158 | TRIB3    | NM_020975 | RET      |
| NM_001163817 | DHCR7          | NM_001330543 | EPSTI1  | NM_022071 | SH2D4A   | NM_021076 | NEFH     |
| NM_001164317 | FLNB           | NM_001330557 | EPB41L3 | NM_022652 | DUSP6    | NM_021158 | TRIB3    |
| NM_001164318 | FLNB           | NM_001330663 | HMGCS1  | NM_024078 | NOC4L    | NM_022652 | DUSP6    |
| NM_001164319 | FLNB           | NM_001331228 | EPSTI1  | NM_024111 | CHAC1    | NM_024078 | NOC4L    |
| NM_001164835 | L1TD1          | NM_001343    | DAB2    | NM_024605 | ARHGAP10 | NM_024605 | ARHGAP10 |
| NM_001171814 | OAT            | NM_001345944 | PFKP    | NM_024954 | UBTD1    | NM_025107 | MYCT1    |
| NM_001172632 | OLR1           | NM_001346590 | INSIG1  | NM_025107 | MYCT1    | NM_025130 | HKDC1    |
| NM_001172633 | OLR1           | NM_001346591 | INSIG1  | NM_025130 | HKDC1    | NM_031308 | EPPK1    |
| NM_001174159 | SH2D4A         | NM_001346592 | INSIG1  | NM_025232 | REEP4    | NM_031459 | SESN2    |
| NM_001174160 | SH2D4A         | NM_001346593 | INSIG1  | NM_031308 | EPPK1    | NM_145119 | PJA1     |
| NM_001177998 | SLC34A2        | NM_001346594 | INSIG1  | NM_031459 | SESN2    | NM_153022 | TMEM52B  |
| NM_001177999 | SLC34A2        | NM_001348985 | ABCG2   | NM_032711 | MAFG     | NM_182810 | ATF4     |
| NM_001178017 | DBI            | NM_001348986 | ABCG2   | NM_033138 | CALD1    | NM_206828 | NLRP7    |
| NM_001178041 | DBI            | NM_001348987 | ABCG2   | NM_033139 | CALD1    |           |          |
| NM_001178042 | DBI            | NM_001348988 | ABCG2   | NM_033140 | CALD1    |           |          |
| NM_001178043 | DBI            | NM_001348989 | ABCG2   | NM_033157 | CALD1    |           |          |
| NM_001188    | BAK1           | NM_001352432 | DBI     | NM_033255 | EPSTI1   |           |          |
| NM_001193544 | ANXA6          | NM_001354558 | NDRG2   | NM_033421 | SNX21    |           |          |
| NM_001197    | BIK            | NM_001354559 | NDRG2   | NM_052845 | MMAB     |           |          |
| NM_001198910 | CCDC169-SOHLH2 | NM_001354560 | NDRG2   | NM_080597 | OSBPL1A  |           |          |
| NM_001199989 | RASD1          | NM_001354561 | NDRG2   | NM_139176 | NLRP7    |           |          |
| NM_001204450 | CCPG1          | NM_001354562 | NDRG2   | NM_144497 | AKAP12   |           |          |
| NM_001204451 | CCPG1          | NM_001354564 | NDRG2   | NM_145119 | PJA1     |           |          |
| NM_001242339 | PFKP           | NM_001354565 | NDRG2   | NM_147161 | ACOT11   |           |          |
| NM_001242393 | ACSS2          | NM_001354566 | NDRG2   | NM_152897 | SNX21    |           |          |
| NM_001243120 | SKP2           | NM_001354567 | NDRG2   | NM_153022 | TMEM52B  |           |          |
| NM_001243794 | CHST12         | NM_001354568 | NDRG2   | NM_153256 | PROSER2  |           |          |
| NM_001243795 | CHST12         | NM_001354569 | NDRG2   | NM_173490 | TMEM171  |           |          |

|              |         |              |        |           |         |  |  |
|--------------|---------|--------------|--------|-----------|---------|--|--|
| NM_001244871 | DAB2    | NM_001354570 | NDRG2  | NM_173648 | CCDC141 |  |  |
| NM_001257386 | ABCG2   | NM_001360    | DHCR7  | NM_176782 | FAM151A |  |  |
| NM_001260489 | LSR     | NM_001424    | EMP2   | NM_182810 | ATF4    |  |  |
| NM_001260490 | LSR     | NM_001457    | FLNB   | NM_198336 | INSIG1  |  |  |
| NM_001261403 | NFKB2   | NM_001512    | GSTA4  | NM_198337 | INSIG1  |  |  |
| NM_001281533 | EPB41L3 | NM_001675    | ATF4   | NM_201535 | NDRG2   |  |  |
| NM_001281534 | EPB41L3 | NM_001946    | DUSP6  | NM_201536 | NDRG2   |  |  |
| NM_001281535 | EPB41L3 | NM_001975    | ENO2   | NM_201537 | NDRG2   |  |  |
| NM_001282211 | NDRG2   | NM_002087    | GRN    | NM_201538 | NDRG2   |  |  |
| NM_001282212 | NDRG2   | NM_002130    | HMGCS1 | NM_201539 | NDRG2   |  |  |
| NM_001282213 | NDRG2   | NM_002337    | LRPAP1 | NM_201540 | NDRG2   |  |  |
| NM_001282214 | NDRG2   | NM_002359    | MAFG   | NM_201541 | NDRG2   |  |  |
| NM_001282215 | NDRG2   | NM_002490    | NDUFA6 | NM_205834 | LSR     |  |  |
| NM_001282216 | NDRG2   | NM_002502    | NFKB2  | NM_205835 | LSR     |  |  |
| NM_001282633 | DBI     | NM_002543    | OLR1   | NM_206828 | NLRP7   |  |  |
| NM_001282634 | DBI     | NM_002627    | PFKP   |           |         |  |  |
| NM_001282635 | DBI     | NM_003129    | SQLE   |           |         |  |  |
| NM_001282636 | DBI     | NM_003290    | TPM4   |           |         |  |  |
| NM_001286679 | LARP6   | NM_003641    | IFITM1 |           |         |  |  |
| NM_001288724 | NFKB2   | NM_003714    | STC2   |           |         |  |  |
| NM_001289987 | FILIP1  | NM_003818    | CDS2   |           |         |  |  |
| NM_001293273 | MCCC1   | NM_003914    | CCNA1  |           |         |  |  |
| NM_001300866 | FILIP1  | NM_003979    | GPRC5A |           |         |  |  |
| NM_001301188 | TRIB3   | NM_004102    | FABP3  |           |         |  |  |
| NM_001301190 | TRIB3   | NM_004165    | RRAD   |           |         |  |  |
| NM_001301193 | TRIB3   | NM_004173    | SLC7A4 |           |         |  |  |
| NM_001301196 | TRIB3   | NM_004342    | CALD1  |           |         |  |  |
| NM_001301201 | TRIB3   | NM_004477    | FRG1   |           |         |  |  |
